# Supplementary material for: Defining the separation landscape of topological domains for decoding consensus domain organization of the 3D genome
Source: HighWire-hosted journal article supplement (doi:10.1101/gr.277187.122), 2023-03-01
Supplement: Supplemental_Table_S1.xlsx [file Supplemental_Table_S1.xlsx]

## Sheet: Sheet1
Supplemental Table S1: The information of datasets used in this study
Data type	Cell type	Source	Accession number or file name or website
Hi-C	GM12878	Gene Expression Omnibus	GSE63525
	K562
	HMEC
	HUVEC
	IMR90
	NHEK
	KBM7
CTCF peaks	GM12878	UCSC genome browser	wgEncodeEH000029
	K562		wgEncodeEH000042
	HMEC		wgEncodeEH000419
	HUVEC		wgEncodeEH000551
	IMR90		wgEncodeEH002831
	NHEK		wgEncodeEH000406
RAD21 peaks	GM12878	UCSC genome browser	wgEncodeEH001640
SMC3 peaks	GM12878	UCSC genome browser	wgEncodeEH001833
Dnase-seq peaks	GM12878	UCSC genome browser	wgEncodeAwgDnaseUwdukeGm12878UniPk.narrowPeak.gz
Dnase-seq peaks	K562	UCSC genome browser	wgEncodeAwgDnaseUwdukeK562UniPk.narrowPeak.gz
H2A.Z ChIP-seq	GM12878 and K562	UCSC genome browser	http://ftp.ebi.ac.uk/pub/databases/ensembl/encode/integration_data_jan2011/byDataType/signal/jan2011/bigwig
H3K27me3 ChIP-seq
H3K9me3 ChIP-seq
H3K27ac ChIP-seq
H3K4me1 ChIP-seq
H3K4me2 ChIP-seq
H3K4me3 ChIP-seq
H3K9ac ChIP-seq
H3K36me3 ChIP-seq
H3K79me2 ChIP-seq
H4K20me1 ChIP-seq
CTCF ChIP-seq
RAD21 ChIP-seq
SMC3 ChIP-seq
YY1 ChIP-seq
Pol2 ChIP-seq
DNA methylation	GM12878	Gene Expression Omnibus	GSM1368907
DNA methylation	K562	Gene Expression Omnibus	GSM1368906
Repli-seq	GM12878	Gene Expression Omnibus	GSM923451
Repli-seq	K562	Gene Expression Omnibus	GSM923448
RNA-seq	GM12878	Roadmap	https://egg2.wustl.edu/roadmap/data/byDataType/rna/
RNA-seq	K562	Roadmap	https://egg2.wustl.edu/roadmap/data/byDataType/rna/
ChromHMM states	GM12878	Roadmap	https://egg2.wustl.edu/roadmap/web_portal/chr_state_learning.html
	HMEC
	HUVEC
	IMR90
	K562
Segway	GM12878	ENCODE	ENCFF058KWZ
	HUVEC		ENCFF202BIE
	IMR90		ENCFF762DWI
	K562		ENCFF996BDE
Subcompartment	GM12878	Prediction by SNIPER	http://genome.compbio.cs.cmu.edu:8008/~kxiong/data/sniper/annotations/hg19/
	HMEC
	HUVEC
	IMR90
	K562
Repeat elements	hg19	UCSC genome browser	http://hgdownload.cse.ucsc.edu/goldenPath/hg19/database/rmsk.txt.gz
phastCons scores	hg19	UCSC genome browser	https://hgdownload.cse.ucsc.edu/goldenpath/hg19/phastCons46way/vertebrate/
House keeping genes	hg19		https://pilotfiber.dl.sourceforge.net/project/rseqc/BED/Human_Homo_sapiens/hg19.HouseKeepingGenes.bed
Micro-C	mESC	4D Nucleome Data Portal	4DNES14CNC1I
MERFISH	IMR90	Zenodo	https://zenodo.org/record/3928890
