# Supplementary material for: Defining the separation landscape of topological domains for decoding consensus domain organization of the 3D genome
Source: HighWire-hosted journal article supplement (doi:10.1101/gr.277187.122), 2023-03-01
Supplement: Supplemental_Table_S2.xlsx [file Supplemental_Table_S2.xlsx]

## Sheet: Table S1
Supplemental Table S2: Source code and paramaters used for 16 TAD-calling methods
Index	TAD-calling methods	Source code	Paramater setting
1	CHDF	https://journal.hep.com.cn/qb/EN/10.1007/s40484-015-0047-9	Dimension of the Hi-C matrix: chr_size ; Maximum domain number: 200 ; Maximum domain size: 100 .
2	DI	http://chromosome.sdsc.edu/mouse/hi-c/download.html	Sliding window size: 2500000 ; Corrects probability if size of a cluster is <= min: 2; Checks probability in a cluster: 0.99.
3	IS	https://github.com/blajoie/crane-nature-2015	Windos size (-is): 500000 ; Insulation delta span (-ids): 200000 ; Insulation mode (-im): mean ; Boundary margin of error (-bome): 3 ; Noise threshold, minimum depth of valley (-nt): 0.25 ; FLAG (-v): verbose mode.
4	deDoc	https://github.com/yinxc/structural-information-minimisation	No paramater
5	MSTD	http://page.amss.ac.cn/shihua.zhang/software.html	The threshold for the minimum distance of the elements that have higher density (MDHD): 5 ; Window size: 5.
6	HiTAD	https://pypi.python.org/pypi/TADLib	Maximum domain size in base-pair unit (maxsize): 4000000 ; Remove cached data before existing (RemoveCache): False.
7	CaTCH	https://github.com/zhanyinx/CaTCH_R	Reciprocal insulation (RI): 60%.
8	TopDom	https://github.com/jasminezhoulab/TopDom	Window size: 5.
9	HiCseg	https://cran.r-project.org/web/packages/HiCseg/index.html	Size of the data matrix: chr_size ; Maximal number of change-points: 170 ; Distribution of the data: G is for the Gaussian distribution; Type of model: D for block-diagonal.
10	GMAP	https://github.com/wbaopaul/rGMAP	Log-transformation (logt): True ; Maximum level of hierarchical structures (dom_order): 2 ; ﻿maxDistInBin: 200 ; The minimum window size (min_d): 25 ; ﻿The maximum window size (max_d): 100 ; The minmum lower bound of tad size (min_dp): 5 ; The maximum lower bound of tad size (max_dp): 10 ; The lower bound cutoff for posterior probability (hthr): 0.95 ; Lower bound for t1 for calling TAD (﻿t1thr):…
11	HiCDB	https://github.com/ChenFengling/RHiCDB	﻿Minimum local maximum peak distance (mind): 2 ; ﻿The smallest window sizes (wd): 1 ; ﻿The number of different window size (wdsize): 6 .
12	OnTAD	https://github.com/anlin00007/OnTAD	The maximum size of TADs (maxsz): 200 ; The minimum size of TAD (minsz): 3 ; The penalty applied in scoring function to select positive TADs (penalty): 0.1 ; The cut-off to determine local minimum (ldiff): 1.96 ; The local region size that used to determine local minimum (lsize): 5 ; bedout: false.
13	ICFinder	https://github.com/bcm-uga/IC-Finder	sigmaMinus: 0.3 ; sigmaPlus: 3.
14	Spectral	https://rajapakse.lab.medicine.umich.edu/software	Algebraic connectivity threshold (sig0): 0.4.
15	3DNetMod	https://bitbucket.org/creminslab/3dnetmod_method_v1.0_10_06_17/src	region_size: 210 ; overlop: 0 ; plateau: 3 ; chsfilter: False ; chaos_pct: 0.85 ; num_part: 20 ; plots: False ; pctile_threshold: 0 ; pct_value: 0 ; size_threshold: 4 ; size_s1: 4000000 ; var_thresh1: 100 ; boundary_buffer: 50000.
16	ClusterTAD	https://github.com/BDM-Lab/ClusterTAD	Min_TAD_size: 150000 ; Max_TAD_size: 800000 ; Number_of_Cluster_SearchWindow: 3.
